# Supplementary material for: SETD4 Confers Cancer Stem Cell Chemoresistance in Nonsmall Cell Lung Cancer Patients via the Epigenetic Regulation of Cellular Quiescence
Source: Stem Cells Int. 2023 May 27;2023:7367854. doi: 10.1155/2023/7367854 (PMC10239305; doi:10.1155/2023/7367854)
Supplement: Supplementary Materials — Supplementary Figure S1: representative immunofluorescence (IF) images of SETD4/CD44 in tumor tissues from NSCLC patients. White arrow indicated SETD4-positive cells. DAPI, nuclear counterstaining. Scale bar, 20 μm. Supplementary Figure S2: tumorsphere formation assay of H1299 cell lines and A-qLCSCs derived from H1299 cell lines. n = 3. Scale bar, 200 μm. Supplementary Figure S3: representative IF images of SETD4/CD133 in qLCSCs and A-qLCSCs derived from clinical LUAD and LUSC specimens. DAPI, nuclear counterstaining. Scale bar, 50 μm. Supplementary Figure S4: representative images and survival rate analysis of LCSCsSETD4 and LCSCsGFP after treatment with different concentrations of Taxol (TAX) (100 nmol/L, 200 nmol/L, and 400 nmol/L) (A), pemetrexed (PEM) (100 nmol/L, 200 nmol/L, and 400 nmol/L) (B), gemcitabine (GEM) (0.25 μmol/L, 0.5 μmol/L, and 1.0 μmol/L) (C), and cisplatin (CDDP) (5 μmol/L, 10 μmol/L, and 20 μmol/L) (D). n = 3. Scale bar, 50 μm. ∗∗∗p < 0.001; ∗∗p < 0.01; ∗p < 0.05. Data are presented as the mean ± SD. Supplementary Figure S5: representative IF images of caspase-3 in LCSCsSETD4 and LCSCsGFP after treatments with TAX (200 nmol/L) plus CDDP (10 μmol/L). DAPI, nuclear counterstaining. Scale bar, 50 μm. Supplementary Figure S6: (A) representative IF images of H3K9ac in qLCSCs and A-qLCSCs derived from H1299 and H520 cell lines. DAPI, nuclear counterstaining. Scale bar, 50 μm. (B) Protein levels of H3K9ac in qLCSCs and A-qLCSCs. H3 was used as an internal reference. [file 7367854.f1.zip › Revised Supplementary Figure in this study20230514.docx]

**Supplementary Material**

**SETD4 confers cancer stem cell chemoresistance in non-small cell lung cancer patients via the epigenetic regulation of cellular quiescence**

Yuehong Wang1†, Yuman Yu2†, Weijun Yang3, Linying Wu1, Yaoshun Yang3, Qianyun Lu3, Jianying Zhou1*

1 Department of Respiratory Disease, The First Affiliated Hospital, College of Medicine, Zhejiang University, Hangzhou, 310003, China

2Department of Geriatrics, The First Affiliated Hospital, College of Medicine, Zhejiang University, Hangzhou, 310003, China.

3MOE Laboratory of Biosystem Homeostasis and Protection, College of Life Sciences, Zhejiang University, Hangzhou, 310058, China.

* Corresponding author: Jianying Zhou, M.D., Department of Respiratory Disease, The First Affiliated Hospital, College of Medicine, Zhejiang University, No.79, Qingchun Road, Hangzhou, 310003, China

Tel: +86-571-87236876; Fax: +86-571-87236876

E-mail address: [zjyhz@zju.edu.cn](mailto:zjyhz@zju.edu.cn) (J. Zhou)

†These authors contributed equally to this work.

**Figure S1**

**
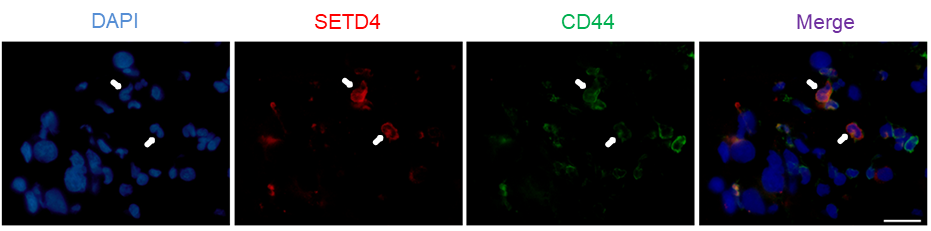
**

**Supplementary Figure S1.** Representative immunofluorescence (IF) images of SETD4/CD44 in tumor tissues from NSCLC patients. White arrow indicated SETD4-positive cells.DAPI, nuclear counterstaining. Scale bar, 20 μm.

**Figure S2**

**
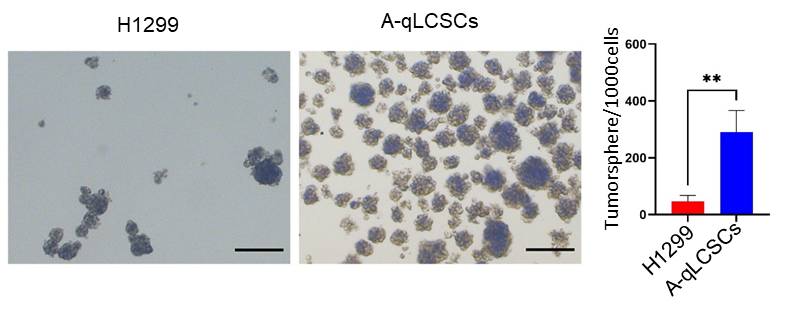
**

**Supplementary Figure S2.** Tumorsphere formation assay of H1299 cell lines and A-qLCSCs derived from H1299 cell lines. n=3. Scale bar, 200 μm**.**

**Figure S3**

**
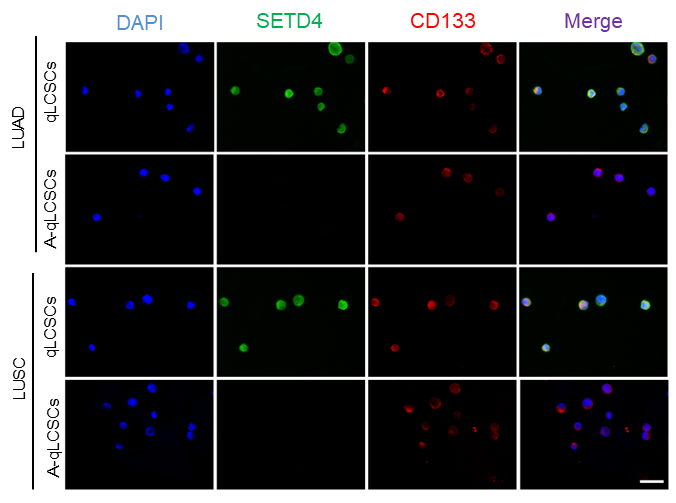
**

**Supplementary Figure S3.** Representative IF images of SETD4/CD133in qLCSCs and A-qLCSCs derived from clinical LUAD and LUSC specimens. DAPI, nuclear counterstaining. Scale bar, 50 μm.

**Figure S4**

**
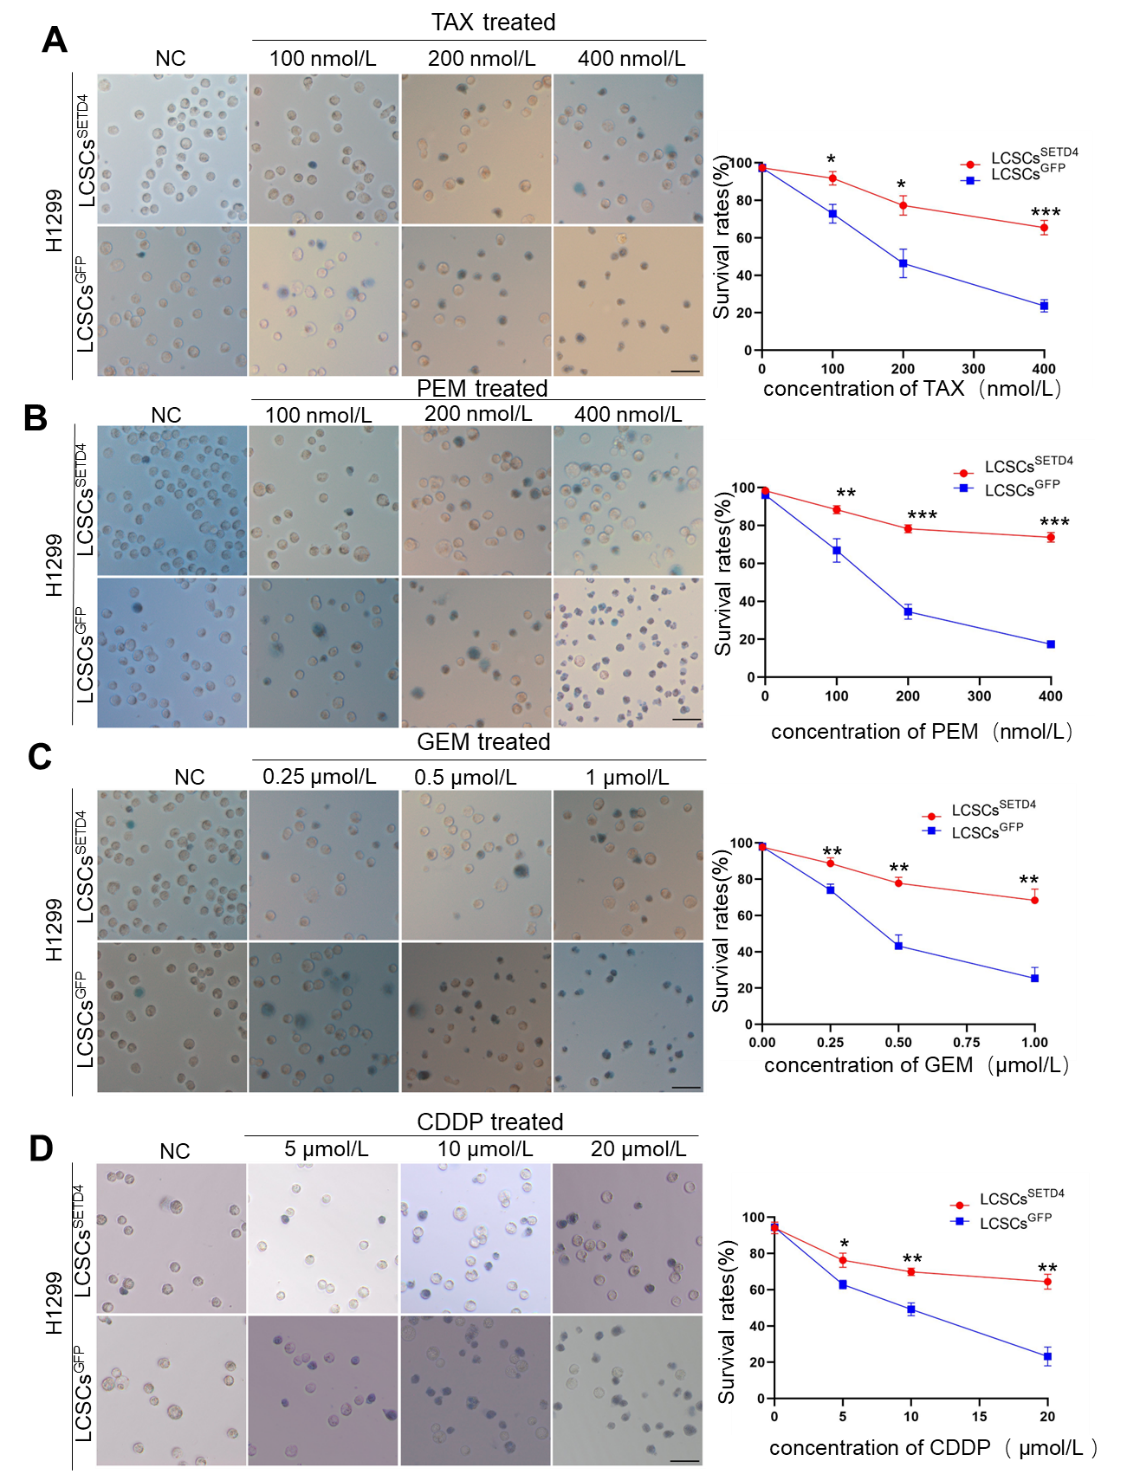
**

**Supplementary Figure S4.** Representative images and survival rate analysis of LCSCsSETD4 and LCSCsGFP after treatment with different concentrations of Taxol (TAX) (100 nmol/L, 200 nmol/L, 400 nmol/L) **(A)**, pemetrexed (PEM) (100 nmol/L, 200 nmol/L, 400 nmol/L) **(B)**, gemcitabine (GEM) (0.25 μmol/L, 0.5 μmol/L, 1.0 μmol/L) **(C)**, and cisplatin (CDDP) (5 μmol/L, 10 μmol/L, 20 μmol/L) **(D)**. n=3. Scale bar, 50 μm. *** p<0.001, ** p<0.01, *p<0.05. Data are presented as the mean ± SD.

**Figure S5**

**
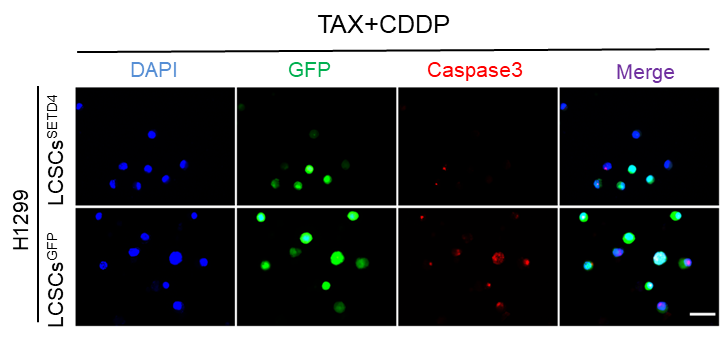
**

**Supplementary Figure S5.** Representative IF images of caspase-3 in LCSCsSETD4 and LCSCsGFP after treatments with TAX (200 nmol/L) plus CDDP (10 μmol/L). DAPI, nuclear counterstaining. Scale bar, 50 μm.

**Figure S6**

**
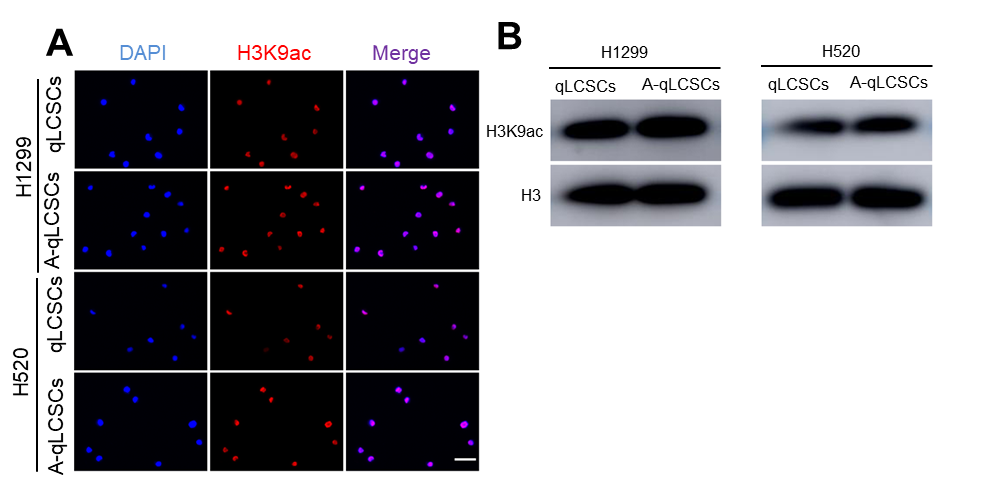
**

**Supplementary Figure S6.** (**A**) Representative IF images of H3K9acin qLCSCs and A-qLCSCs derived from H1299 and H520 cell lines. DAPI, nuclear counterstaining. Scale bar, 50 μm. (**B**) Protein levels of H3K9acin qLCSCs and A-qLCSCs. H3 was used as an internal reference.
